# Supplementary material for: Efficient Generation of Multiple Seamless Point Mutations Conferring Triazole Resistance in Aspergillus fumigatus
Source: MDPI journal article supplement (doi:10.3390/jof9060644), 2023-06-02
Supplement: s1 [file s1]

## Supplementary Tables.

**Table S1. Strains used in this study.**

| Strain                      | Genotype                    | Source                             |
|-----------------------------|-----------------------------|------------------------------------|
| <i>AkuB</i> <sup>KU80</sup> | <i>KU80Δ</i>                | Da Silva Ferreira et al., 2006 [8] |
| <b>Cyp51A G448S</b>         | <i>KU80Δ; cyp51A/G448S</i>  | This study                         |
| <b>Cyp51B G457S</b>         | <i>KU80Δ; cyp51B/G457S</i>  | This study                         |
| <b>Hmg1 F262del</b>         | <i>KU80Δ; hmg1/F262del</i>  | This study                         |
| <b>Cyp51B G457S</b>         | <i>KU80Δ; cyp51B/G457S;</i> | This study                         |
| <b>/Hmg1 F262del</b>        | <i>hmg1/F262del</i>         |                                    |
| <b>Cyp51B G457S/</b>        | <i>KU80Δ; cyp51B/G457S;</i> | This study                         |
| <b>Hmg1 F262del/</b>        | <i>hmg1/F262del;</i>        |                                    |
| <b>Cyp51A G448S</b>         | <i>cyp51A/G448S</i>         |                                    |

**Table S2. Gene amplification primers used in this study**

| Target gene   | Primer name | Primer sequence (5' → 3') | Final construct |
|---------------|-------------|---------------------------|-----------------|
| <i>cyp51A</i> | Cyp51A F    | GGGCTGGAGATACTATGGCTTTCA  | Mutated Cyp51A  |
|               | Cyp51A R    | CAGGTTTTTCGCACGAGCTTC     | G448S           |
| <i>cyp51B</i> | Cyp51B F    | ATGGGTCTCATCGCGTTTCATT    | Mutated Cyp51B  |
|               | Cyp51B R    | TCAGGCTTTGGTAGCGGACTC     | G457S           |
| <i>hmg1</i>   | Hmg1 F      | CAGCATCGAGTCGAGAGAATTT    | Mutated Hmg1    |
|               | Hmg1 R      | CTGCGTTACTCGGTCTTGGTAC    | F262del         |
|               | Hmg1 OF     | TATGCTGCCATATTTGCTGATG    | Hmg1 F262del    |
|               | Hmg1 OR     | ACGAGACAGTAGAGGTAGGCC     | mutation area   |

**Table S3.** crRNAs used in this study

| Target gene   | 5' crRNA             | 3' crRNA             |
|---------------|----------------------|----------------------|
| <i>cyp51A</i> | GGTGCCGATGCTATGGCTTA | GAAGCCAAGCATCATCGGCT |
| <i>cyp51B</i> | ACATGGGTGCTTGTTGGAAT | AAAAGATCGGCCAAGCGGTT |
| <i>hmg1</i>   | GCACCCTATACACACCATTG | GCATGGCGAAACATGAAGTA |

**Table S4.** ARMP-PCR primers used in this study

| Target gene   | Primer name | Primer sequence (5' → 3')  |
|---------------|-------------|----------------------------|
| <i>cyp51A</i> | Cyp51A OF   | TGCTGAGACTGGCCTCACAGC      |
|               | Cyp51A WT   | CACGTCAAGTCCCTATCTTCCGTGTG |
|               | Cyp51A Mut  | ATACAGCGGTGTCGGCCAGCCCT    |
|               | Cyp51A OR   | GCCCTCGAGGGGCTGAATTAAGTAT  |
| <i>cyp51B</i> | Cyp51B OF   | CGTGTTCTCGGATCTGACTTG      |
|               | Cyp51B WT   | CAATGCATCGGTGTCTACCTGATCC  |
|               | Cyp51B Mut  | CCAATAGCCCGTACCTCCCGTGTA   |
|               | Cyp51B OR   | TCAGGCTTTGGTAGCGGACTC      |

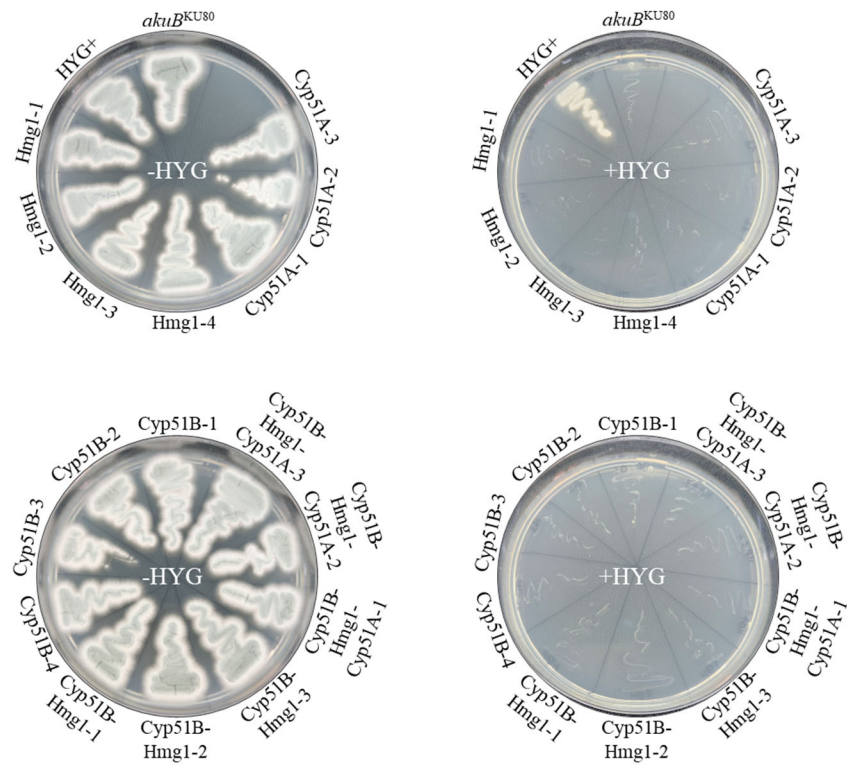

**Figure S1. Analysis of mutants for loss of hygromycin resistance.** Analysis of mutants Hmg1 F262del (Hmg1-1-4), Cyp51A G448S (Cyp51A1-3), Cyp51B G457S (Cyp51B1-4), Cyp51B G457S /Hmg1 F262del 1-3, and Cyp51B G457S/ Hmg1 F262del/ Cyp51A G448S 1-3 for loss of pTel-hyg<sup>R</sup> and HYG resistance. Transformants were passaged twice on YAG absent hygromycin. Single isolates were then streaked on plates supplemented with (+HYG) or without (-HYG) hygromycin (350 µg/ml). Plates were photographed after 24 h incubation at 37C. Controls include parental strain *AkuB*<sup>KU80</sup> and a positive control strain containing the hygromycin resistance cassette stably integrated into the genome (strain designated HYG+).

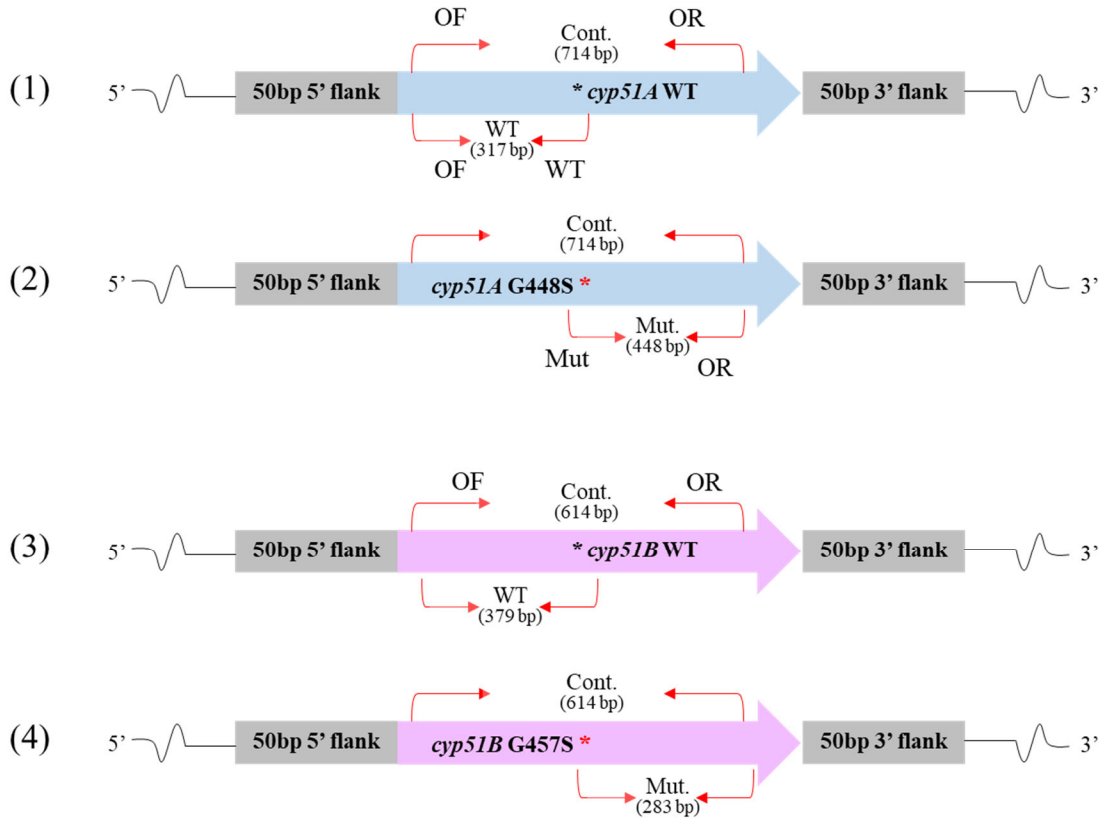

**Figure S2.** ARMS-PCR analysis of *cyp51A* and *cyp51B* point mutations. Cyp51A G448S detection uses three primer sets: Cyp51A OF and Cyp51A OR control primer set (S1.1), amplifying the 714 bp around the mutation (cont), Cyp51A OF and Cyp51A WT amplifying the 317 bp WT sequence if present (S1.1), and Cyp51A OR and Cyp51A Mut primer set, amplifying the 448 bp mutated (Mut.) sequence, if present (S1.2). Cyp51B G457S detection uses three primer sets: Cyp51B OF and Cyp51B OR control primer set (S1.3), amplifying the 614 bp around the mutation (cont), Cyp51B OF and Cyp51B WT amplifying the 379 bp WT sequence if present (S1.3), and Cyp51B OR and Cyp51B Mut primer set, amplifying the 283 bp mutated (Mut.) sequence, if present (S1.4).
